# Supplementary material for: Non–cell-autonomous regulation of interneuron specification mediated by extracellular vesicles
Source: PubMed Central journal article supplement — Sci Adv. 2023 May 19;9(20):eadd8164. doi: 10.1126/sciadv.add8164 (PMC10198641; doi:10.1126/sciadv.add8164), 2023-05-19
Supplement: sciadv.add8164_sm.pdf [file sciadv.add8164_sm.pdf]

Supplementary Materials for  
**Non–cell-autonomous regulation of interneuron specification mediated by  
extracellular vesicles**

Fabrizia Pipicelli *et al.*

Corresponding author: Silvia Cappello, [silvia\\_cappello@psych.mpg.de](mailto:silvia_cappello@psych.mpg.de)

*Sci. Adv.* **9**, eadd8164 (2023)  
DOI: 10.1126/sciadv.add8164

**This PDF file includes:**

Figs. S1 to S8  
Tables S1 and S2

**Fig. S1.**

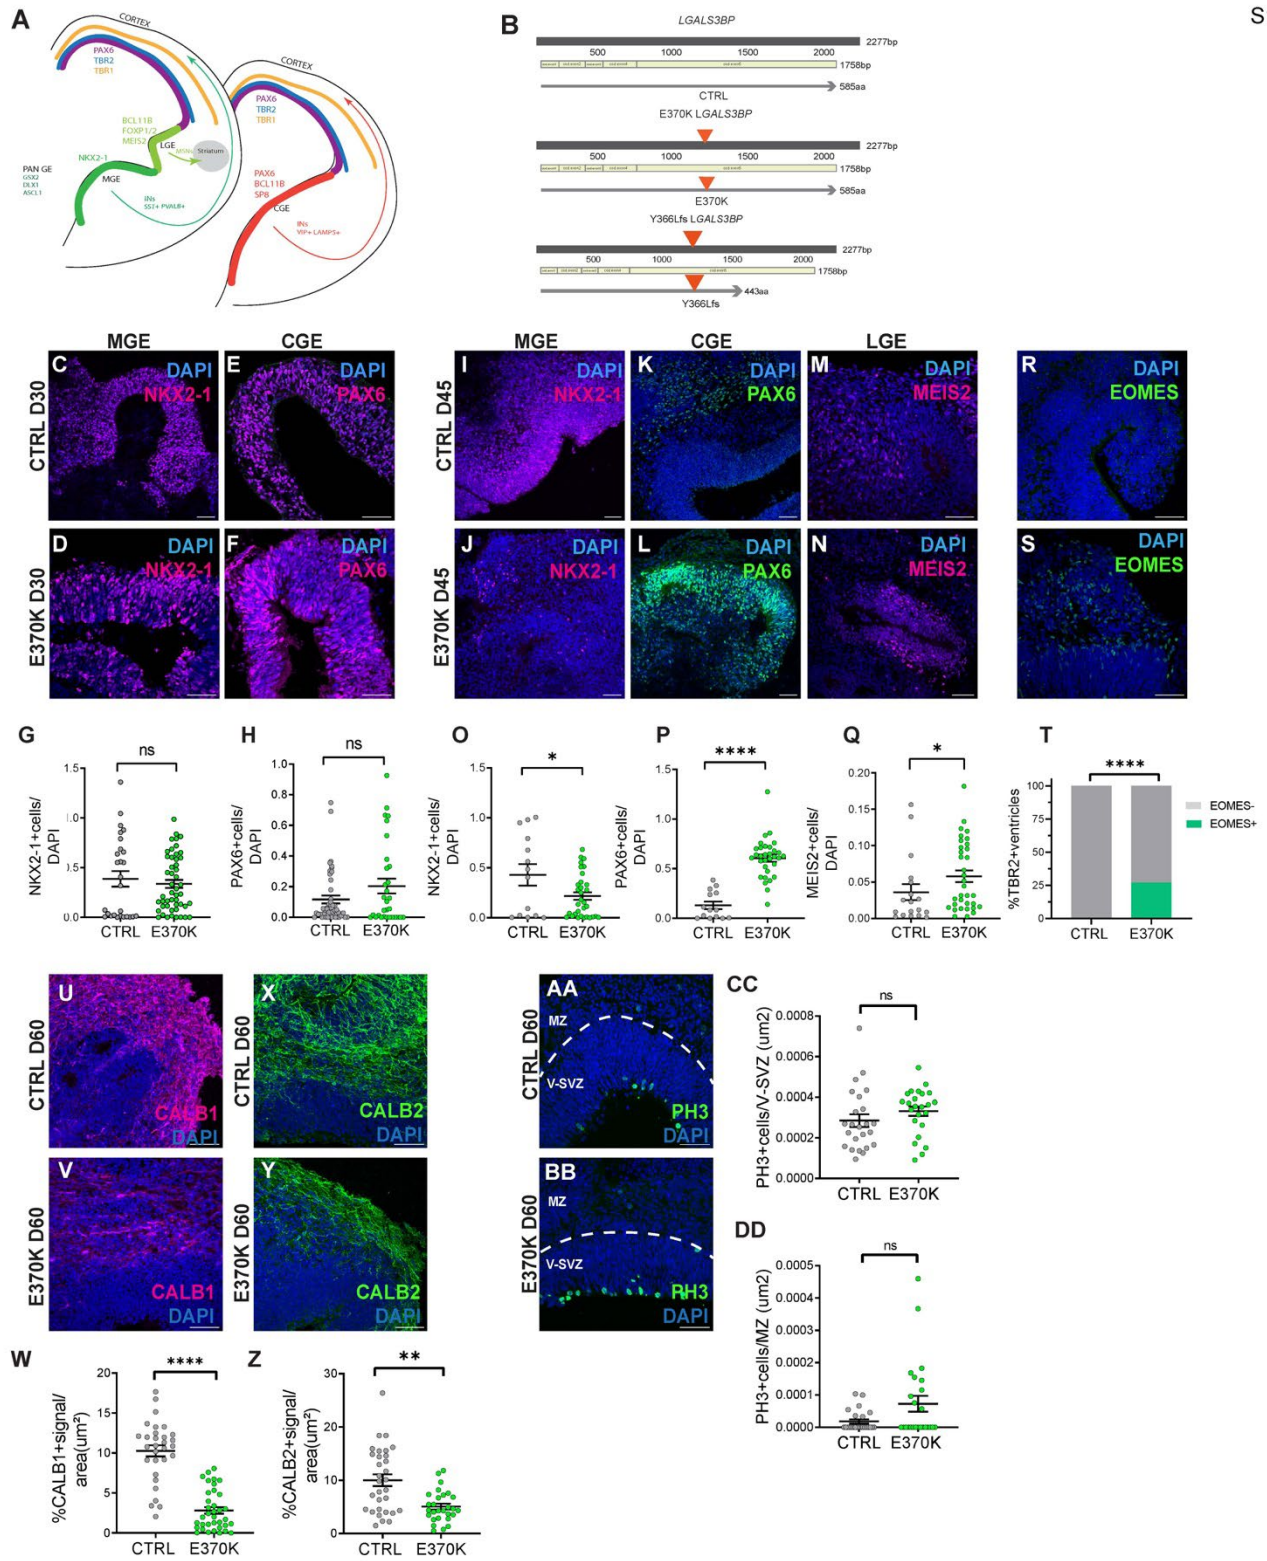

**Fig. S1. LGALS3BP E370K-mutant ventral organoids show alterations in cell identity**

(A) Schematic of tangential migration of interneurons from MGE and CGE to the cortex and markers used for forebrain regional characterization.

(B) Schematic representation of the E370K and Y366Lfs mutant iPSC lines generated using the CRISPR/Cas9 genome editing in control iPSCs. The E370K IPSC line carries a point mutation located in LGALS3BP exon 5 found in a neurological patient, while the Y366Lfs IPSC line presents a 2bp deletion resulting in a frameshift and premature stop codon generating a truncated/KO form of LGALS3BP in exon 5.

(C to F) Micrograph of D30 CTRL and E370K vCOs sections immunostained for MGE marker NKX2-1 antibody (C and D) and CGE marker PAX6 antibody (E and F). Scale bar: 50  $\mu$ m. Nuclei (blue) are stained with DAPI.

(G) Quantification of the number of NKX2-1+cells normalized by DAPI showing no difference in NKX2-1+cells in D30 E370K vCOs compared to CTRL vCOs. Data are shown mean  $\pm$  SEM. Statistical significance was based on two-tailed Mann-Whitney U test \*\*\*\*p<0.0001. Every dot in the plot refers to analyzed ventricles per vCO from at least 3 different vCOs generated in at least 2 independent batches.

(H) Quantification of the number of PAX6+cells normalized by DAPI showing no difference in PAX6+cells in D30 E370K vCOs compared to CTRL vCOs. Data are shown mean  $\pm$  SEM. Statistical significance was based on two-tailed Mann-Whitney U test \*\*\*\*p<0.0001. Every dot in the plot refers to analyzed ventricles per vCO from at least 3 different vCOs generated in at least 2 independent batches.

(I to N) Micrograph of D45 CTRL and E370K vCOs sections immunostained for MGE marker NKX2-1 antibody (I and J), CGE marker PAX6 antibody (K and L), and LGE marker MEIS2 antibody (M and N). Scale bar: 50  $\mu$ m. Nuclei (blue) are stained with DAPI.

(O) Quantification of the number of NKX2-1+cells normalized by DAPI showing a decrease of NKX2-1+ cells in D45 E370K vCOs. Data are shown mean  $\pm$  SEM. Statistical significance was based on two-tailed Mann-Whitney U test \*\*\*\*p<0.0001. Every dot in the plot refers to analyzed ventricles per vCO from at least 3 different vCOs generated in at least 2 independent batches.

(P) Quantification of the number of PAX6+cells normalized by DAPI showing an increase of PAX6+ cells in D45 E370K vCOs. Data are shown mean  $\pm$  SEM. Statistical significance was based on two-tailed Mann-Whitney U test \*\*\*\*p<0.0001. Every dot in the plot refers to analyzed ventricles per vCO from at least 3 different vCOs generated in at least 2 independent batches.

(Q) Quantification of the number of MEIS2+cells normalized by DAPI showing an increase of MEIS2+ cells in D45 E370K vCOs. Data are shown mean  $\pm$  SEM. Statistical significance was based on two-tailed Mann-Whitney U test \*\*\*\*p<0.0001. Every dot in the plot refers to analyzed ventricles per vCO from at least 3 different vCOs generated in at least 2 independent batches.

(R and S) Micrograph of D45 CTRL and E370K vCOs sections immunostained for IP marker EOMES. Scale bar: 50  $\mu$ m. Nuclei (blue) are stained with DAPI.

(T) Quantification of the percentage of ventricles with EOMES+cells (>10 cells), showing the unexpected expression of EOMES in D45 E370K vCOs. Statistical significance was based on exact binomial test \*\*\*\*p<0.0001. n of analyzed ventricles: CTRL=54, E30K=63, from 2 different batches.

(U and V) Micrograph of D60 CTRL and E370K vCOs sections immunostained for the inhibitory neuronal marker CALB1. Scale bar: 50  $\mu$ m. Nuclei (blue) are stained with DAPI.

(W) Quantification of the percentage of CALB1+ pixels normalized per area ( $\mu$ m<sup>2</sup>), showing the decrease of CALB1 in E370K vCOs. Data are shown mean  $\pm$  SEM. Statistical significance was

based on two-tailed Mann-Whitney U test \*\*\*\* $p < 0.0001$ . Every dot in the plot refers to analyzed ventricles per vCO from at least 3 different vCOs generated in at least 2 independent batches.

**(X and Y)** Micrograph of D60 CTRL and E370K vCOs sections immunostained for the inhibitory neuronal marker CALB1. Scale bar: 50  $\mu\text{m}$ . Nuclei (blue) are stained with DAPI.

**(Z)** Quantification of the percentage of CALB2+ pixels normalized per area ( $\mu\text{m}^2$ ), showing the decrease of CALB2 in E370K vCOs. Data are shown mean  $\pm$  SEM. Statistical significance was based on two-tailed Mann-Whitney U test \*\*\*\* $p < 0.0001$ . Every dot in the plot refers to analyzed ventricles per vCO from at least 3 different vCOs generated in at least 2 independent batches.

**(AA and BB)** Micrograph of D60 CTRL (**AA**) and Y366Lfs (**BB**) vCOs sections immunostained for PH3. Scale bar: 50  $\mu\text{m}$ . Nuclei (blue) are stained with DAPI.

**(CC and DD)** Quantification of the number of PH3+ cells, showing no difference in their number in V-SVZ (**CC**) and MZ (**DD**) in E370K compared to CTRL vCOs.

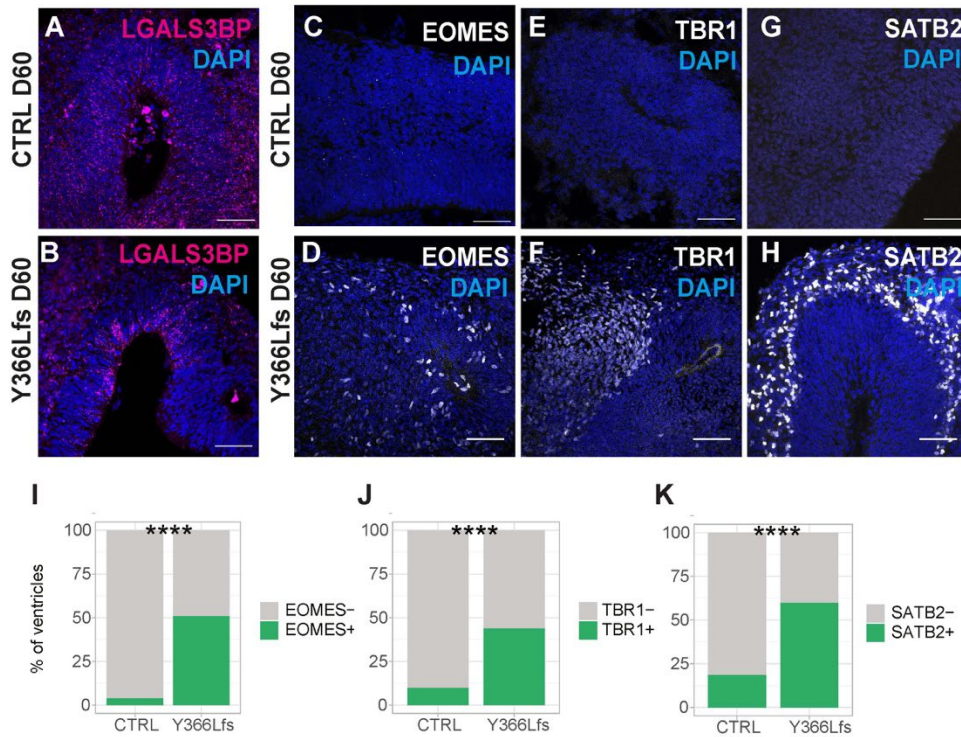

**Fig. S2. LGALS3BP E370K-mutant ventral organoids show dorsal identity**

(A and B) Micrograph of D60 CTRL and Y366Lfs vCOs sections immunostained for LGALS3BP. Scale bar: 50  $\mu$ m. Nuclei (blue) are stained with DAPI.

(C to H) Micrograph of D60 CTRL and Y366Lfs vCOs sections immunostained for IP marker EOMES (C and D), deep layer cortical neurons TBR1 (E and F) and upper layer cortical neurons SATB2 (G and H) Scale bar: 50  $\mu$ m. Nuclei (blue) are stained with DAPI.

(I) Quantification of the percentage of ventricles with EOMES+cells (>10 cells), showing the unexpected expression of EOMES in D60 Y366Lfs vCOs. Statistical significance was based on exact binomial test \*\*\*\*p<0.0001. n of analyzed ventricles: CTRL=96, Y366Lfs =80, from 2 different batches.

(J) Quantification of the percentage of ventricles with TBR1+cells (>10 cells), showing the unexpected expression of TBR1 in D60 Y366Lfs vCOs. Statistical significance was based on exact binomial test \*\*\*\*p<0.0001. n of analyzed ventricles: CTRL=100, Y366Lfs =119, from 2 different batches.

(K) Quantification of the percentage of ventricles with SATB2+cells (>10 cells), showing the unexpected expression of SATB2 in D60 Y366Lfs vCOs. Statistical significance was based on exact binomial test \*\*\*\*p<0.0001. n of analyzed ventricles: CTRL=48, Y366Lfs =119; from 2 different batches.



**Fig. S3.**

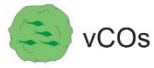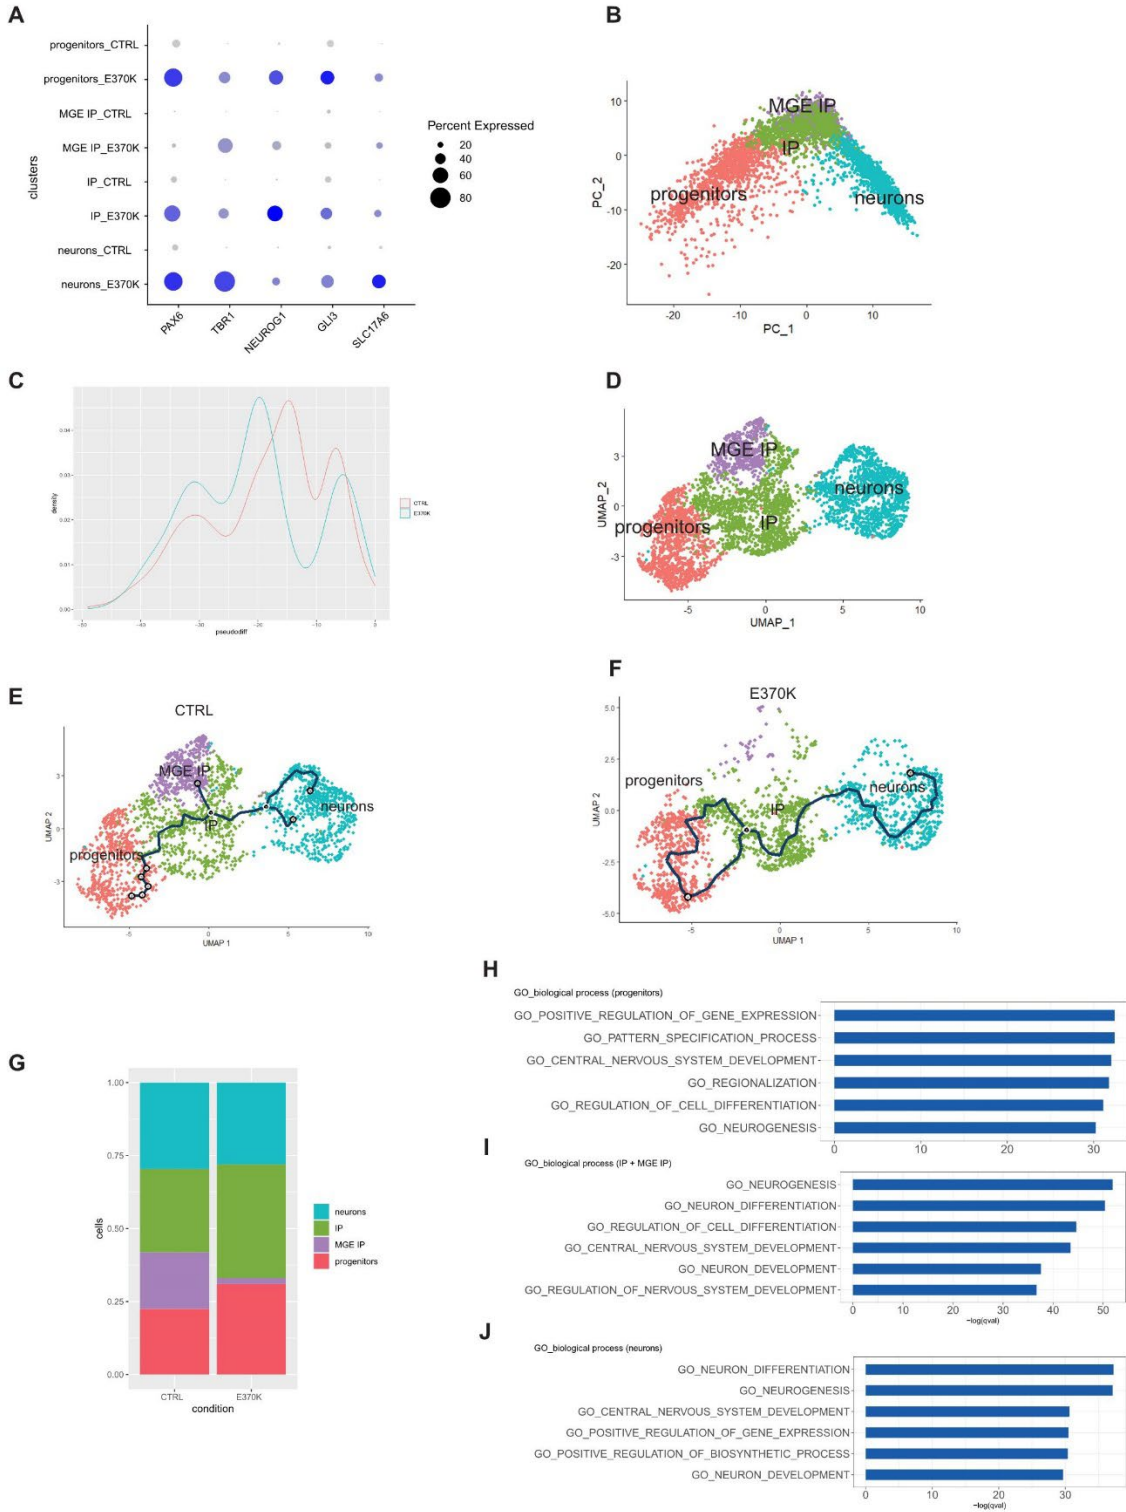

**Fig. S3. LGALS3BP variation causes alterations in cell fate and developmental trajectory**

(A) Dot plot showing the percentage of cells expressed cortical genes in D60 CTRL and E370K-vCO clusters. Progenitors, IP and MGE IP, and neurons from E370K-vCOs show a higher percentage of cells expressing *PAX6*, *TBRI*, *NEUROG1*, *GLI3* and *SCL17A6* compared to CTRL cells.

(B) Principal component analysis (PCA) visualization of D60 CTRL and E370K vCOs, showing the pseudo-differentiation axis from progenitors to neurons.

(C) Density plot showing cell distribution along pseudo-differentiation axis in CTRL and E370K vCOs.

(D) UMAP visualization of scRNA-seq data of telencephalic cells in D60 CTRL and E370K vCOs.

(E) UMAP visualization of pseudo-differentiation trajectories in 60 days old CTRL vCOs clusters from progenitors to INs. CTRL vCOs present trajectories from progenitors to IP; from IP to MGE IP, and from IP to neurons.

(F) UMAP visualization of pseudo-differentiation trajectories in D60 E370K vCOs clusters from progenitors to INs. E370K vCOs lack in the trajectory from IP to MGE IP.

(G) Bar plot showing cell proportion in D60 CTRL and E370K vCOs. E370K vCOs present an increased progenitor population and decreased MGE-IP population compared to CTRL vCOs.

(H to J) GO enrichment for DE genes in E370K progenitors (H), E370K IP and MGE-IP (I), and E370K neurons (J). Significant GOs for biological processes are reported (FDR<0.05).

Fig. S4.

S4

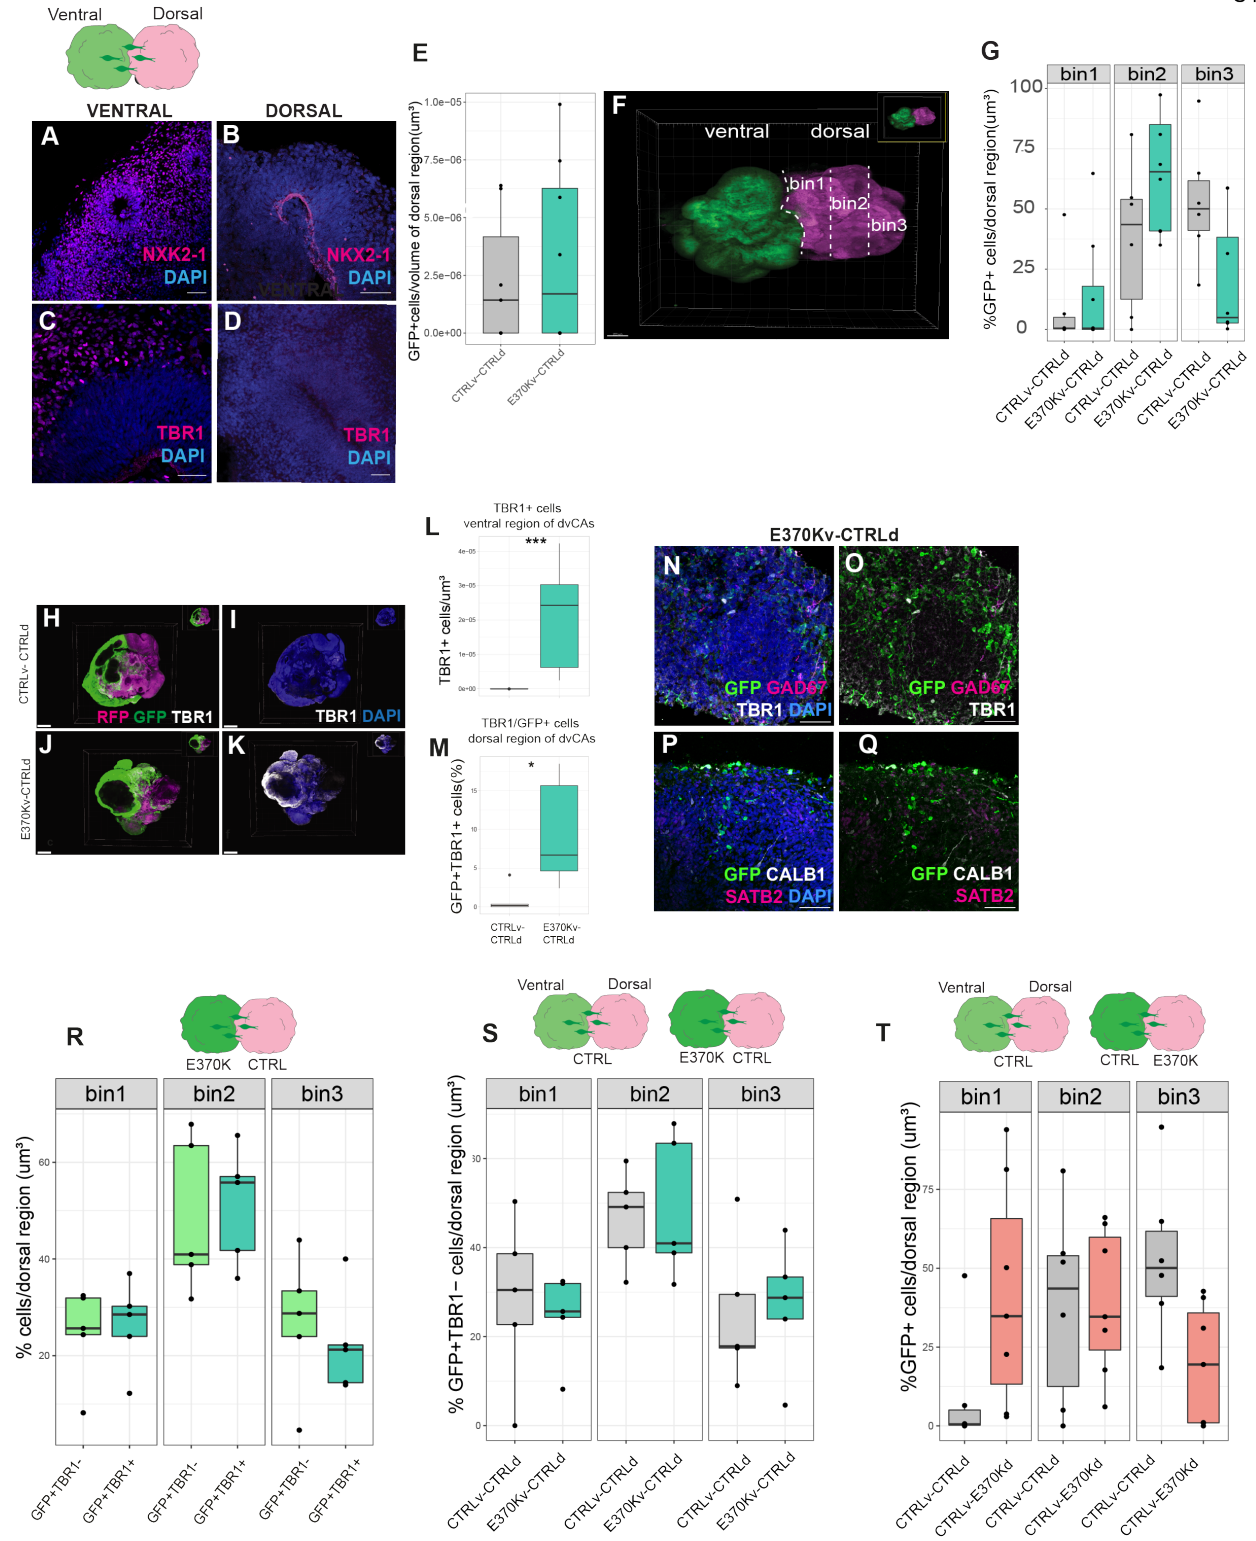

Lorem ipsum



#### **Fig. S4. Cell fate changes result in migratory dynamics defects**

(A and B) Micrograph of D60 dvCAs, showing the expression of the ventral marker NKX2-1 (magenta) only in the ventral region (A) and not in the dorsal region of dvCAs (B). Scale bar: 50  $\mu\text{m}$ . Nuclei (blue) are stained with DAPI.

(C and D) Micrograph of D60 dvCAs, showing the expression of the dorsal marker TBR1 (magenta) only in the dorsal region (D) and not in the ventral region of dvCAs (C). Scale bar: 50  $\mu\text{m}$ . Nuclei (blue) are stained with DAPI.

(E) Quantification of the number of GFP+ventral cells migrated from ventral to dorsal in D60 CTRLv-CTRLd and E370Kv-CTRLd CAs, showing no difference in GFP+migrated cells. Box plots show median and interquartile range. Significance was based on the Mann-Whitney U test. Every dot in the plots refers to analyzed vCAs generated in at least 2 independent batches.

(F) Schematic of binning analysis in cleared D60 dvCAs.

(G) Binning analysis in cleared D60 CTRL and E370Kv-CTRLd CAs. Quantification of the distribution of GFP+cells migrated into the dorsal region of CTRL dvCAs, compared to GFP+cells migrated into the dorsal region of E370Kv-CTRLd CAs, showing no difference in their distribution. Box plots show median and interquartile ranges. Statistical significance was based on the Kruskal-Wallis test. Every dot in the plots refers to analyzed dvCAs generated in at least 2 independent batches.

(H to K) Micrograph of 3D immunostaining of cleared CTRLv-CTRLd and E370Kv-CTRLd CAs for GFP (green) and TBR1 (grey). Scale bar: 500  $\mu\text{m}$ . Nuclei (blue) are stained with DAPI.

(L) Quantification of TBR1+cells in the ventral region of CTRLv-CTRLd and E370Kv-CTRLd CAs, normalized by volume ( $\mu\text{m}^3$ ) showing the unexpected expression of TBR1 in the ventral side of E370Kv-CTRLd dvCAs. Box plots show median and interquartile range. Statistical significance was based on Mann-Whitney U test \* $p < 0.05$ , \*\*\* $p < 0.001$ . n of organoids: CTRLv-CTRLd =5, LGALS3BPv-CTRLd=9, from at least 2 different batches.

(M) Quantification of the percentage of migrated GFP+ventral cells expressing the deep layer cortical marker TBR1 in dorsal region of CTRLv-CTRLd and E370v-CTRLd dvCAs, showing the significant increase of E370K-GFP migrating cells expressing TBR1. Box plots show median and interquartile range. Statistical significance was based on Mann-Whitney U test \* $p < 0.05$ , \*\*\* $p < 0.001$ . n of organoids: CTRLv-CTRLd =5, LGALS3BPv-CTRLd=9, from at least 2 different batches.

(N to Q) Micrograph of D60 dorsal regions of E370Kv-CTRLd CAs immunostained for the inhibitory neuronal marker GAD67 (magenta) and the deep layer neuronal cortical marker TBR1 (grey) (N and O); and for the inhibitory neuronal marker CALB1 (grey) and the upper layer neuronal cortical marker SATB2 (magenta) (P and Q), showing that E370K-GFP migrating cells expressing cortical markers do not co-express inhibitory markers. Scale bar: 50  $\mu\text{m}$ . Nuclei (blue) are stained with DAPI.

(R) Binning analysis in cleared D60 E370Kv-CTRLd CAs. Quantification of the distribution of E370K-GFP+TBR1- cells migrated into the dorsal region of E370Kv-CTRLd CAs, compared to E370K-GFP+TBR1+ cells, showing no difference in their distribution. Box plots show median and interquartile range. Statistical significance was based on the Kruskal-Wallis test. Every dot in the plots refers to analyzed dvCAs generated in at least 2 independent batches.

(S) Binning analysis in cleared D60 CTRL and E370Kv-CTRLd CAs. Quantification of the distribution of GFP+TBR1- cells migrated into the dorsal region of CTRL and E370Kv-CTRLd CAs, showing no difference in their distribution. Box plots show median and interquartile range. Statistical significance was based on the Kruskal-Wallis test.

(T) Binning analysis in cleared D60 CTRL<sub>v</sub>-CTRL<sub>d</sub> and CTRL<sub>v</sub> -E370Kd CAs (schematic at the top). Quantification of distribution of GFP<sup>+</sup> ventral cells migrated into dorsal of 60 days old CTRL<sub>v</sub>-CTRL<sub>d</sub> and CTRL<sub>v</sub> -E370Kd CAs, showing significant changes in distribution in bin 1 and 2. Box plots show median and interquartile range. Statistical significance was based on the Mann-Whitney U test \* $p < 0.05$ . Every dot in the plots refers to analyzed dvCAs generated in at least 2 independent batches.

Fig. S5.

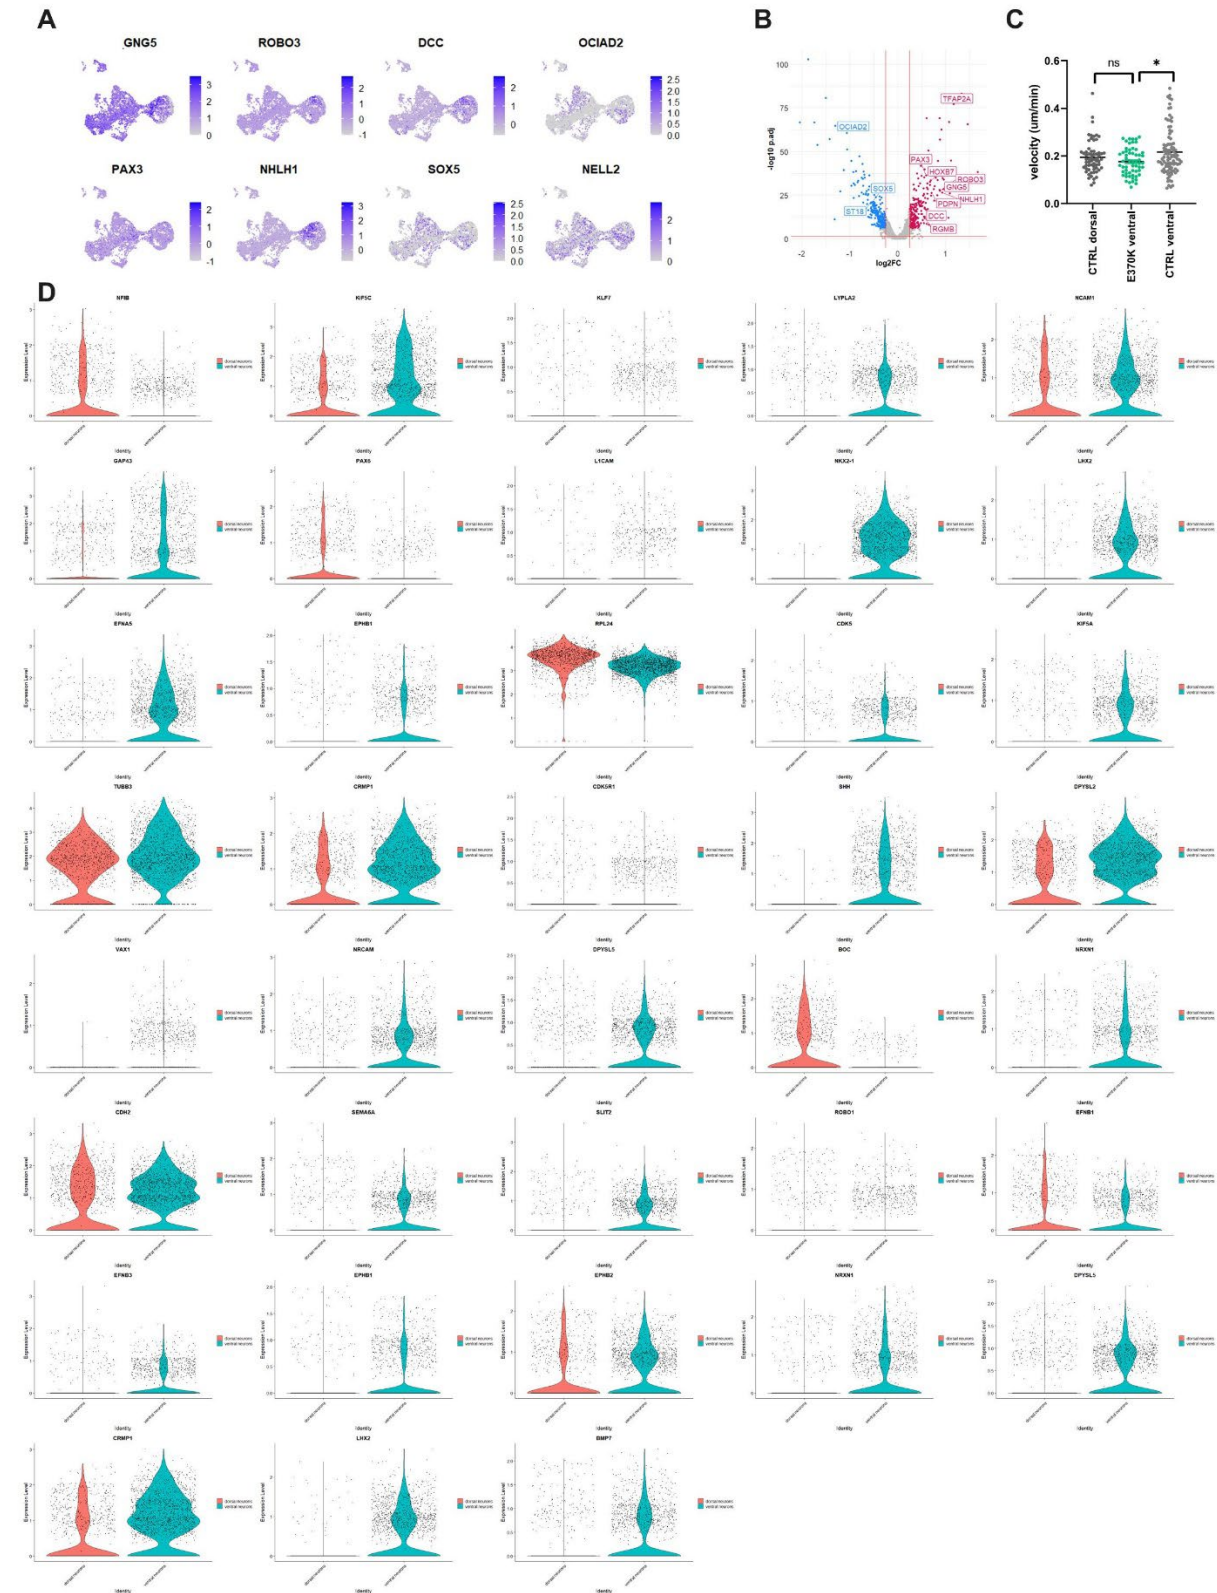

**Fig. S5. Genes associated to neuronal migration are dysregulated in LGALS3BP E370K-mutant ventral organoids**

(A) Feature plot depicting the expression of genes associated with PH (*GNG5*, *ROBO3*, *DCC*, *OCIAD2*, *PAX6*, *NHLH1*, *SOX5*, *NELL2*) in CTRL and E370K vCOs.

(B) Volcano plot showing the fold change (CTRL vs E370K) of gene expression of PH-associated genes in E370K neurons.

(C) Graph showing the comparison between velocity (um/min) of CTRL dorsal neurons (analyzed in Klaus et al., 2019 36), E370K ventral neurons and CTRL ventral neurons migrating within the dorsal region. E370K neurons from E370Kv-CTRLd CAs show a migratory behavior similar to control dorsal neurons. Data are shown mean  $\pm$  SEM. Statistical significance was based on the Mann-Whitney U test \* $p < 0.05$ . Every dot in the plots refers to single cells per CO or dvCA.

(D) Violin plots depicting the expression of genes associated with neuronal migration and axon guidance in dorsal and ventral organoids, from scRNA-seq data.

Fig. S6.

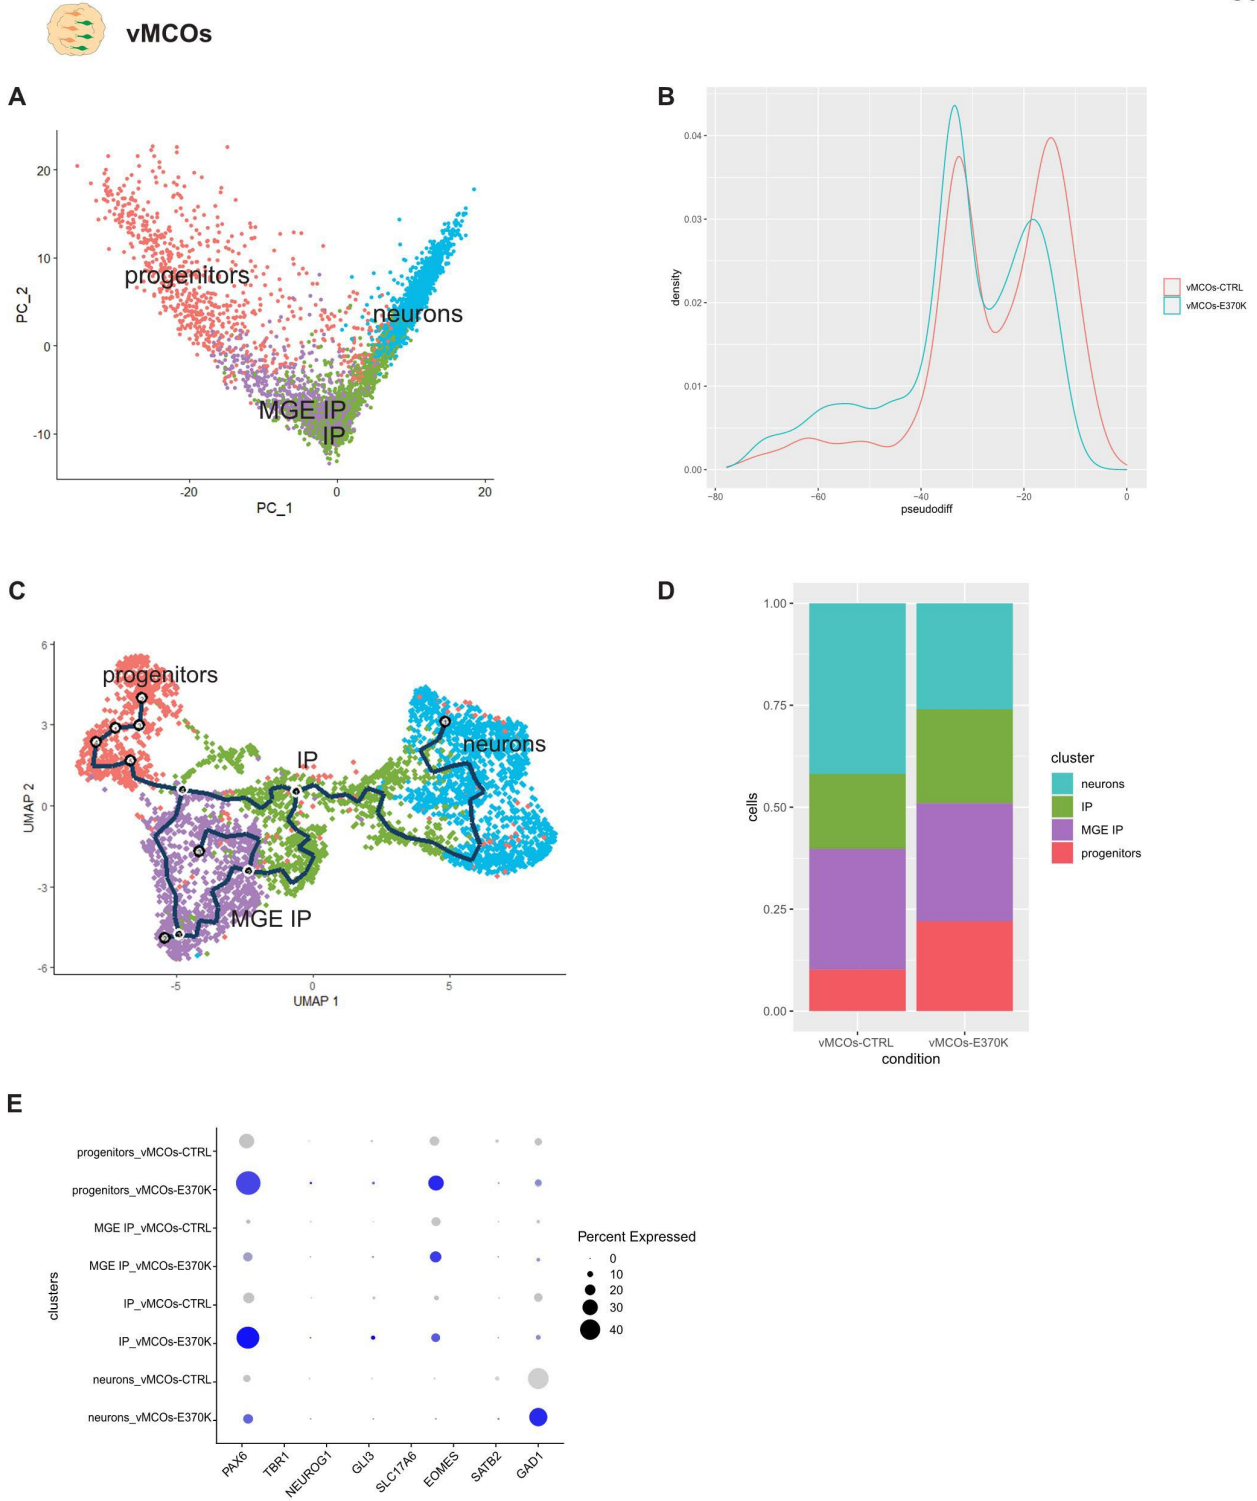

**Fig. S6. LGALS3BP can revert the molecular identity of mutant ventral progenitors and neurons**

(A) Principal component analysis (PCA) visualization of D60 vMCOs, showing the pseudo-differentiation axis from progenitors to neurons.

(B) Density plot showing cell distribution along pseudo-differentiation axis of vMCOs-CTRL and vMCOs-E370K obtained from D60 vMCOs.

(C) UMAP visualization of pseudo-differentiation trajectories in D60 vMCOs clusters from progenitors to neurons, showing trajectories from progenitors to IP; from IP to MGE IP, and from IP to neurons.

(D) Bar plot showing cell proportion in D60 vMCOs -CTRLs and vMCOs- vMCOs. E370K vCOs present an increased progenitor population and decreased MGE-IP population compared to CTRL vCOs.

(E) Dot plot showing the percentage of cells expressed cortical genes in D60 in vMCOs clusters. E370K progenitors, IP and MGE IP, show a higher percentage of cells expressing *PAX6*, and *EOMES*, compared to vMCOs-CTRL, while E370K and CTRL neurons show comparable percentage of cells expressing *TBR1*, *NEUROG1*, *GLI3*, *SCL17A6*, *SATB2* and *GAD1*.



**Fig. S7.**

S7

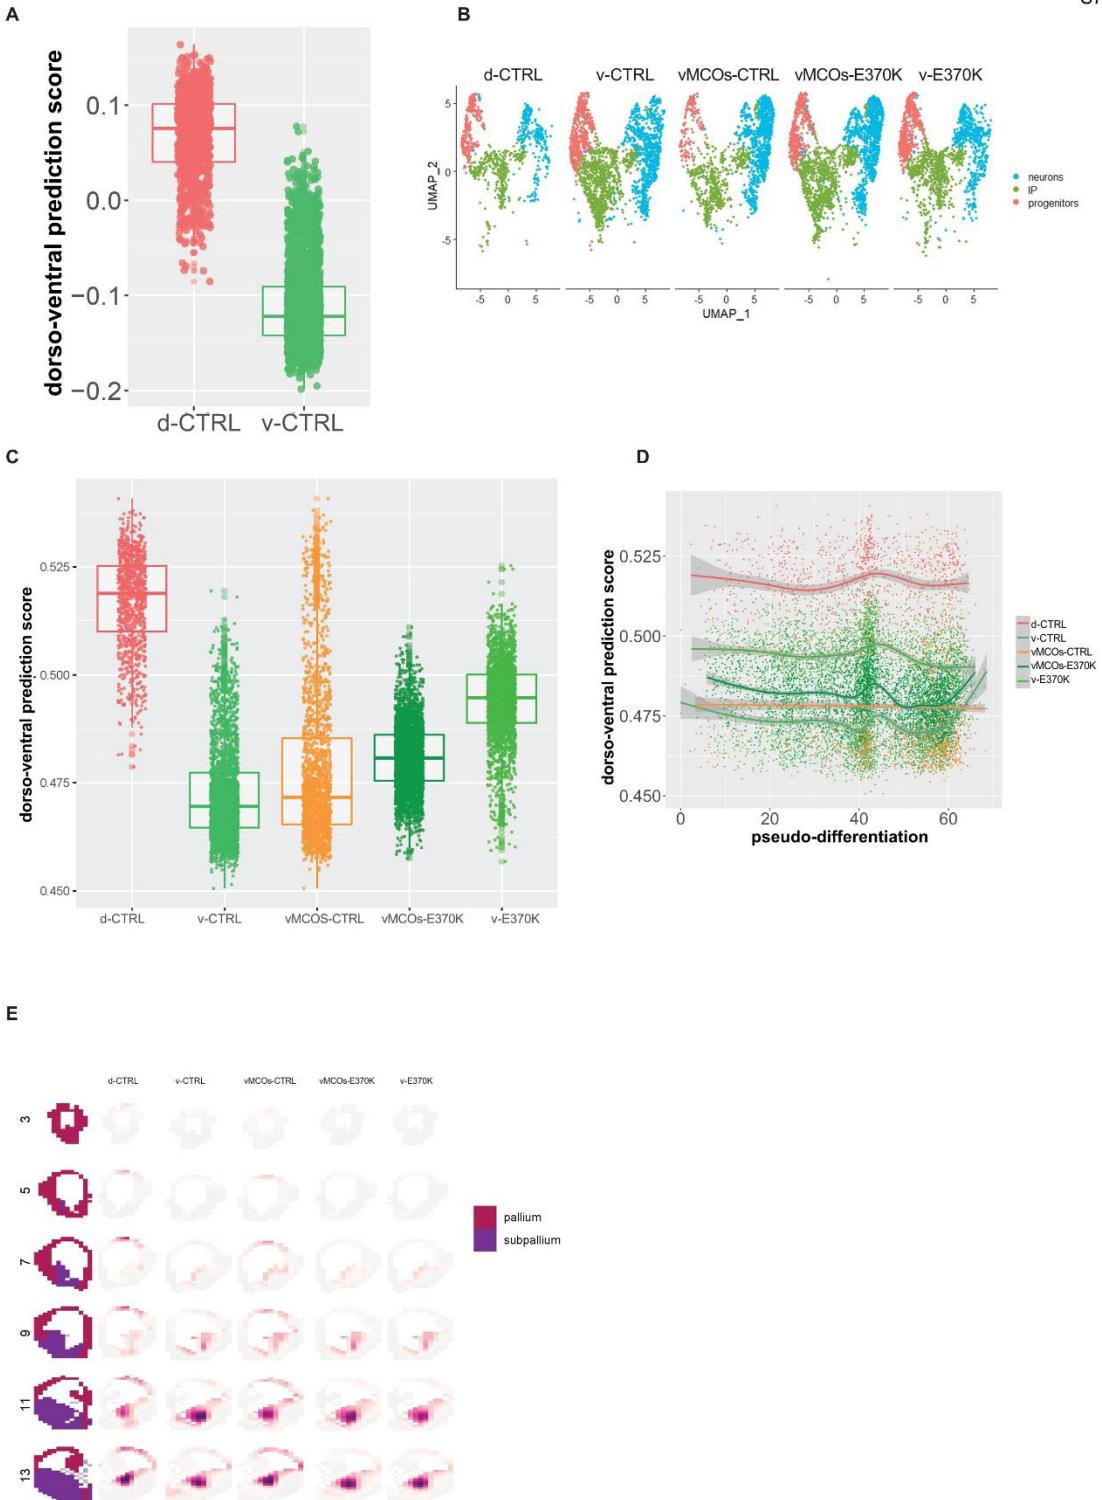

**Fig. S7. LGALS3BP can revert the molecular identity of mutant ventral progenitors and neuron**

(A) Box plot showing the DV prediction score based on fold cross validation. The model was trained on a subset of scRNA-seq data from D60 dorsal CTRL COs (d-CTRL) and ventral CTRL COs (v-CTRL).

(B) UMAP visualization of scRNA-seq data of D60 CTRL dCOs (d-CTRL), CTRL vCOs (v-CTRL), E370K vCOs (v-E370K) and vMCOs (vMCOs-CTRL and -E370K), split by conditions.

(C) Boxplot showing the DV score of d-CTRL, v-CTRL, v-E370K and vMCOs-CTRL and vMCOs-E370K. v-E370K cells show a higher DV score compared to v-CTRL cells, and vMCOs-E370K cells show a lower DV score compared to v-E370K cells. Box plots show median and interquartile range. Each dot in the plot represents one cell.

(D) Density plot showing the distribution of DV prediction score of each condition along the pseudo-differentiation axis of d-CTRL, v-CTRL, v-E370K and vMCOs-CTRL and vMCOs-E370K.

(E) VoxHunt spatial brain mapping of the scRNA-seq from all conditions onto data from E13.5 mouse brains from the Allen Brain Institute.

Fig. S8.

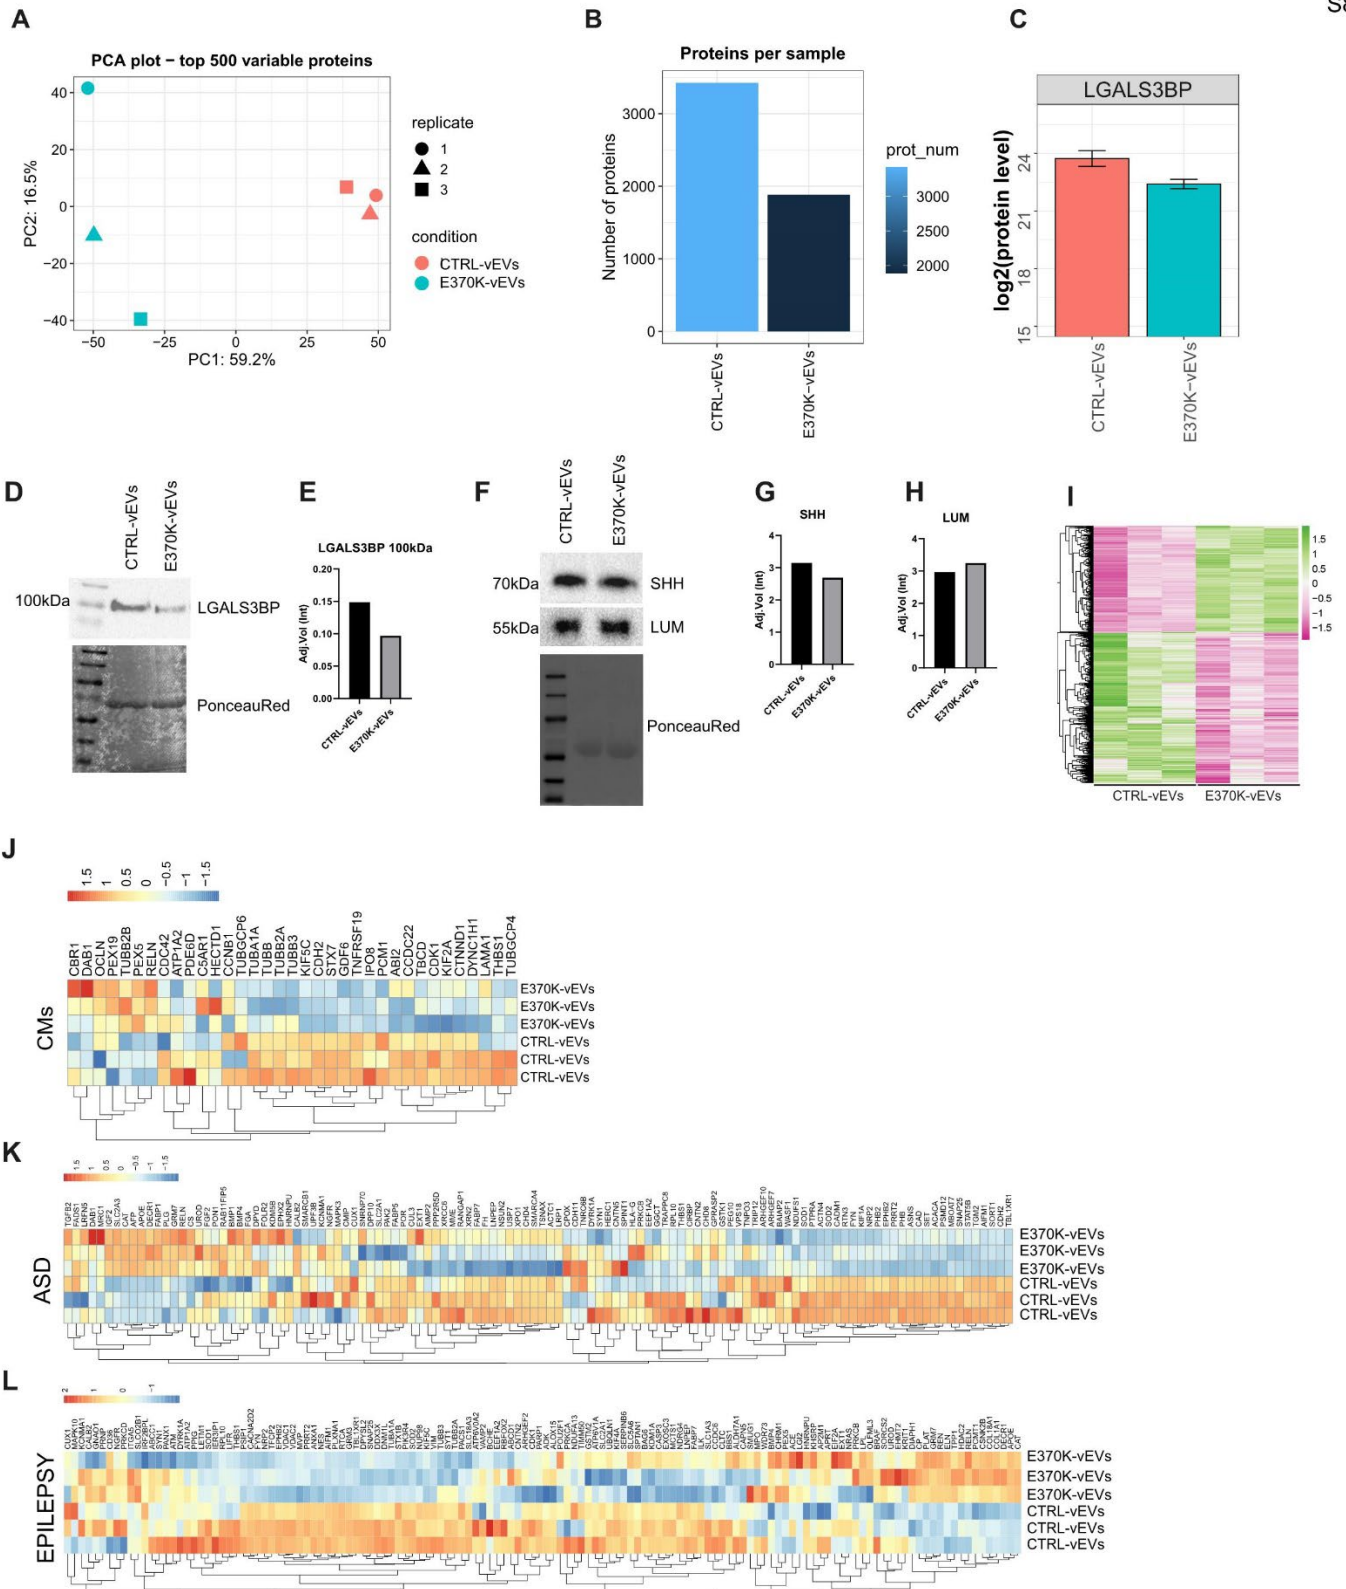

**Fig. S8. Extrinsic EV-mediated function of LGALS3BP in progenitor specification and neurodevelopmental disorders**

**(A)** Principal component analysis (PCA) of protein samples from EVs collected from CTRL and E370K vCOs, based on LFQ intensity of quantified proteins. All the replicates are represented.

**(B)** Bar plot showing the number of proteins detected in CTRL-vEVs and E370K-vEVs collected from vCOs. E370K-vEVs show decreased number of detected proteins.

**(C)** Bar plot of LGALS3BP protein level detected in CTRL-vEVs and E370K-vEVs, showing a decrease of LGALS3BP expression in E370K-vEVs compared to CTRL-vEVs.

**(D)** WB of protein extract of CTRL-vEVs and E370K-vEVs for LGALS3BP.

**(E)** Volumetric analysis of the expression of LGALS3BP in CTRL-vEVs and E370K-vEVs, normalized by PonceauRed.

**(F)** WB of protein extract of CTRL- vEVs and E370K-vEVs for SHH and LUM.

**(G)** Volumetric analysis of the expression of SHH in CTRL-vEVs and E370K-vEVs, normalized by PonceauRed.

**(H)** Volumetric analysis of the expression of LUM in CTRL-vEVs and E370K-vEVs, normalized by PonceauRed.

**(I)** Heatmap showing transcriptomic profile changes in NPCs after treatment with vEVs and E370K-vEVs.

**(J to L).** Heatmap of DE protein in E370K-vEVs compared to CTRL-EVs associated with CM **(J)**, ASD **(K)**, and epilepsy **(L)**.

Table S1. Immunostaining primary antibodies

| Antibody | Host        | Company                     | Catalogue No. | Dilution |
|----------|-------------|-----------------------------|---------------|----------|
| NKX2.1   | Mouse IgG1  | Merk<br>Millipore           | MAB5460       | 1:500    |
| TBR1     | Rabbit      | Abcam                       | Ab31940       | 1:500    |
| LGALS3BP | Mouse IgG1  | eBioscience                 | BMS146        | 1:100    |
| PAX6     | Rabbit      | Biolegend                   | PRB-278p      | 1:500    |
| MEIS2    | Mouse IgG1  | Santa Cruz<br>Biotechnology | SC 101850     | 1:300    |
| EOMES    | Rabbit      | Abcam                       | ab23345       | 1:500    |
| SATB2    | Mouse IgG1  | Abcam                       | Ab51502       | 1:500    |
| GAD67    | Mouse IgG2b | Millipore                   | MAB5406       | 1:1000   |
| CALB1    | Rabbit      | Swang                       | CB-38a        | 1:1000   |
| CALB2    | Rabbit      | Swang                       | CRGP7         | 1:1000   |
| GFP      | Chicken     | Aves Lab                    | GFP-1020      | 1:1000   |
| pH3      | Rabbit      | Millipore                   | 06-570        | 1:500    |

Table S2. Immunostaining secondary antibodies

| Antibody      | Host        | Company                    | Catalogue No. | Dilution |
|---------------|-------------|----------------------------|---------------|----------|
| AlexaFluor647 | Rabbit      | ThermoFisher<br>Scientific | A21244        | 1:1000   |
| AlexaFluor488 | Chicken     | ThermoFisher<br>Scientific | A11039        | 1:1000   |
| AlexaFluor546 | Mouse IgG1  | ThermoFisher<br>Scientific | A21123        | 1:1000   |
| AlexaFluor488 | Rabbit      | ThermoFisher<br>Scientific | A11008        | 1:1000   |
| AlexaFluor647 | Mouse IgG2a | ThermoFisher<br>Scientific | A21241        | 1:1000   |
